# Supplementary material for: Antitumoral Activity of the Universal Methyl Donor S-Adenosylmethionine in Glioblastoma Cells
Source: MDPI journal article supplement (doi:10.3390/molecules29081708), 2024-04-10
Supplement: s1 [file s1]

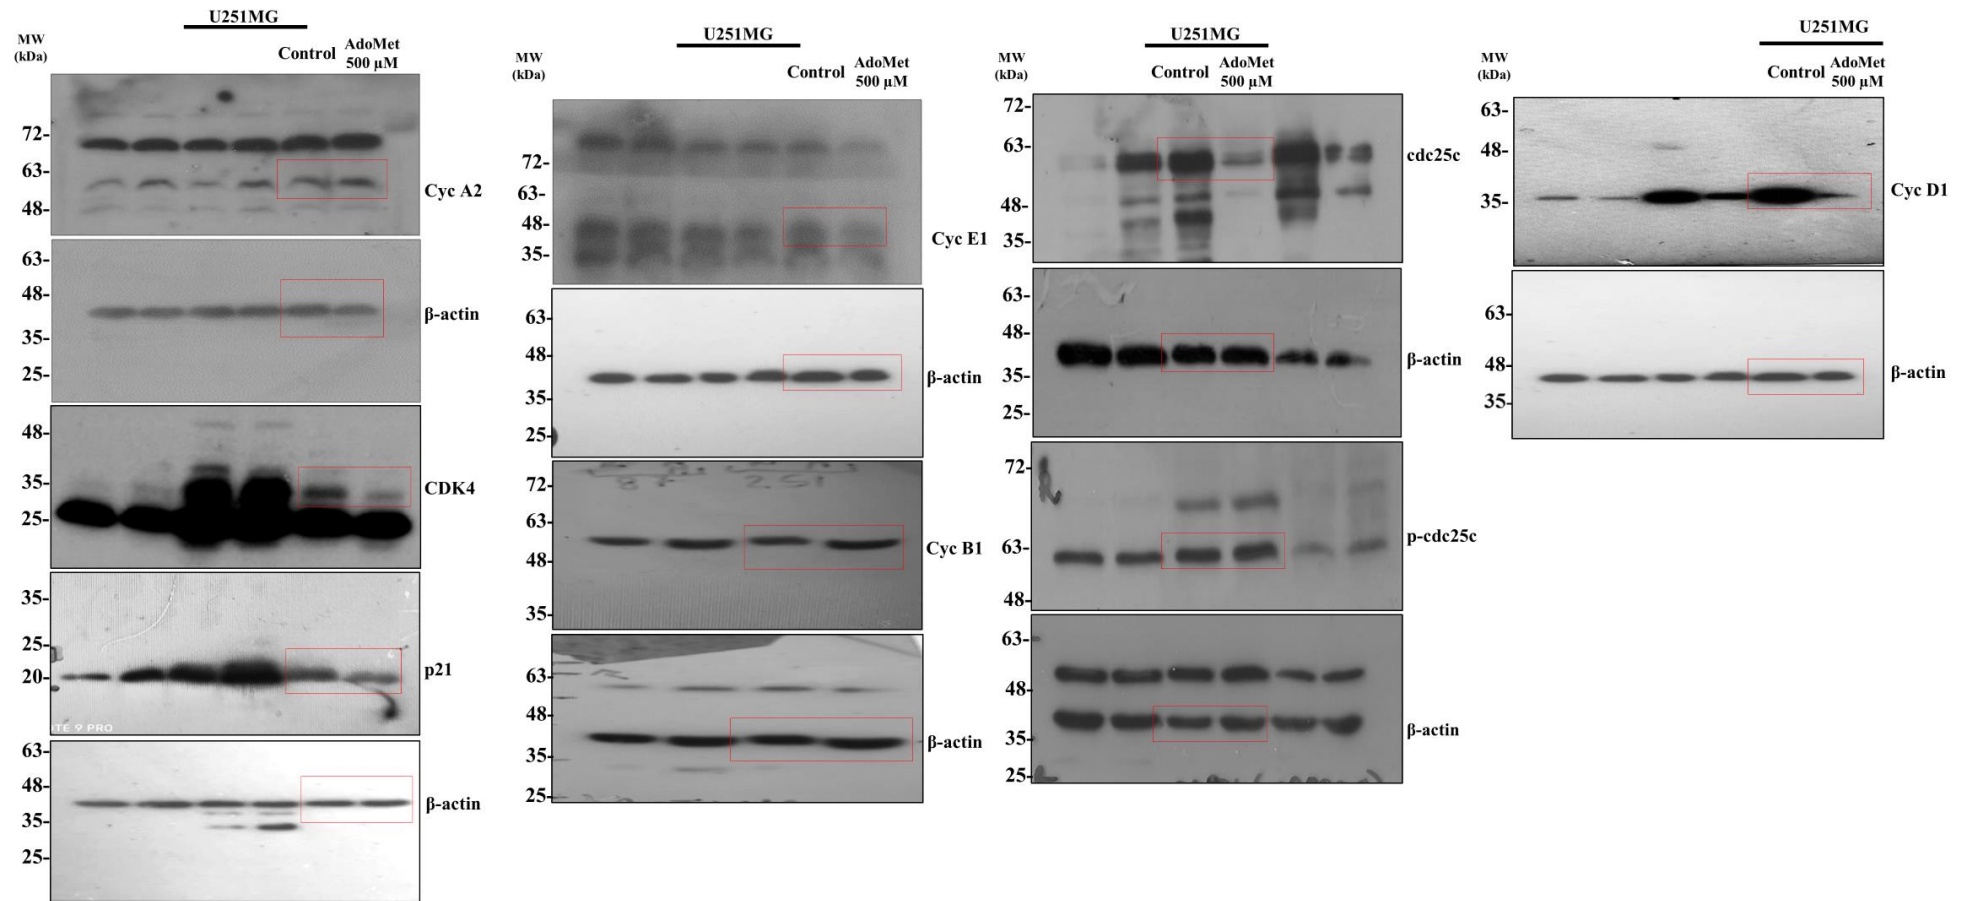

**Figure S1:** Effect of AdoMet on cell cycle in U251MG cells.

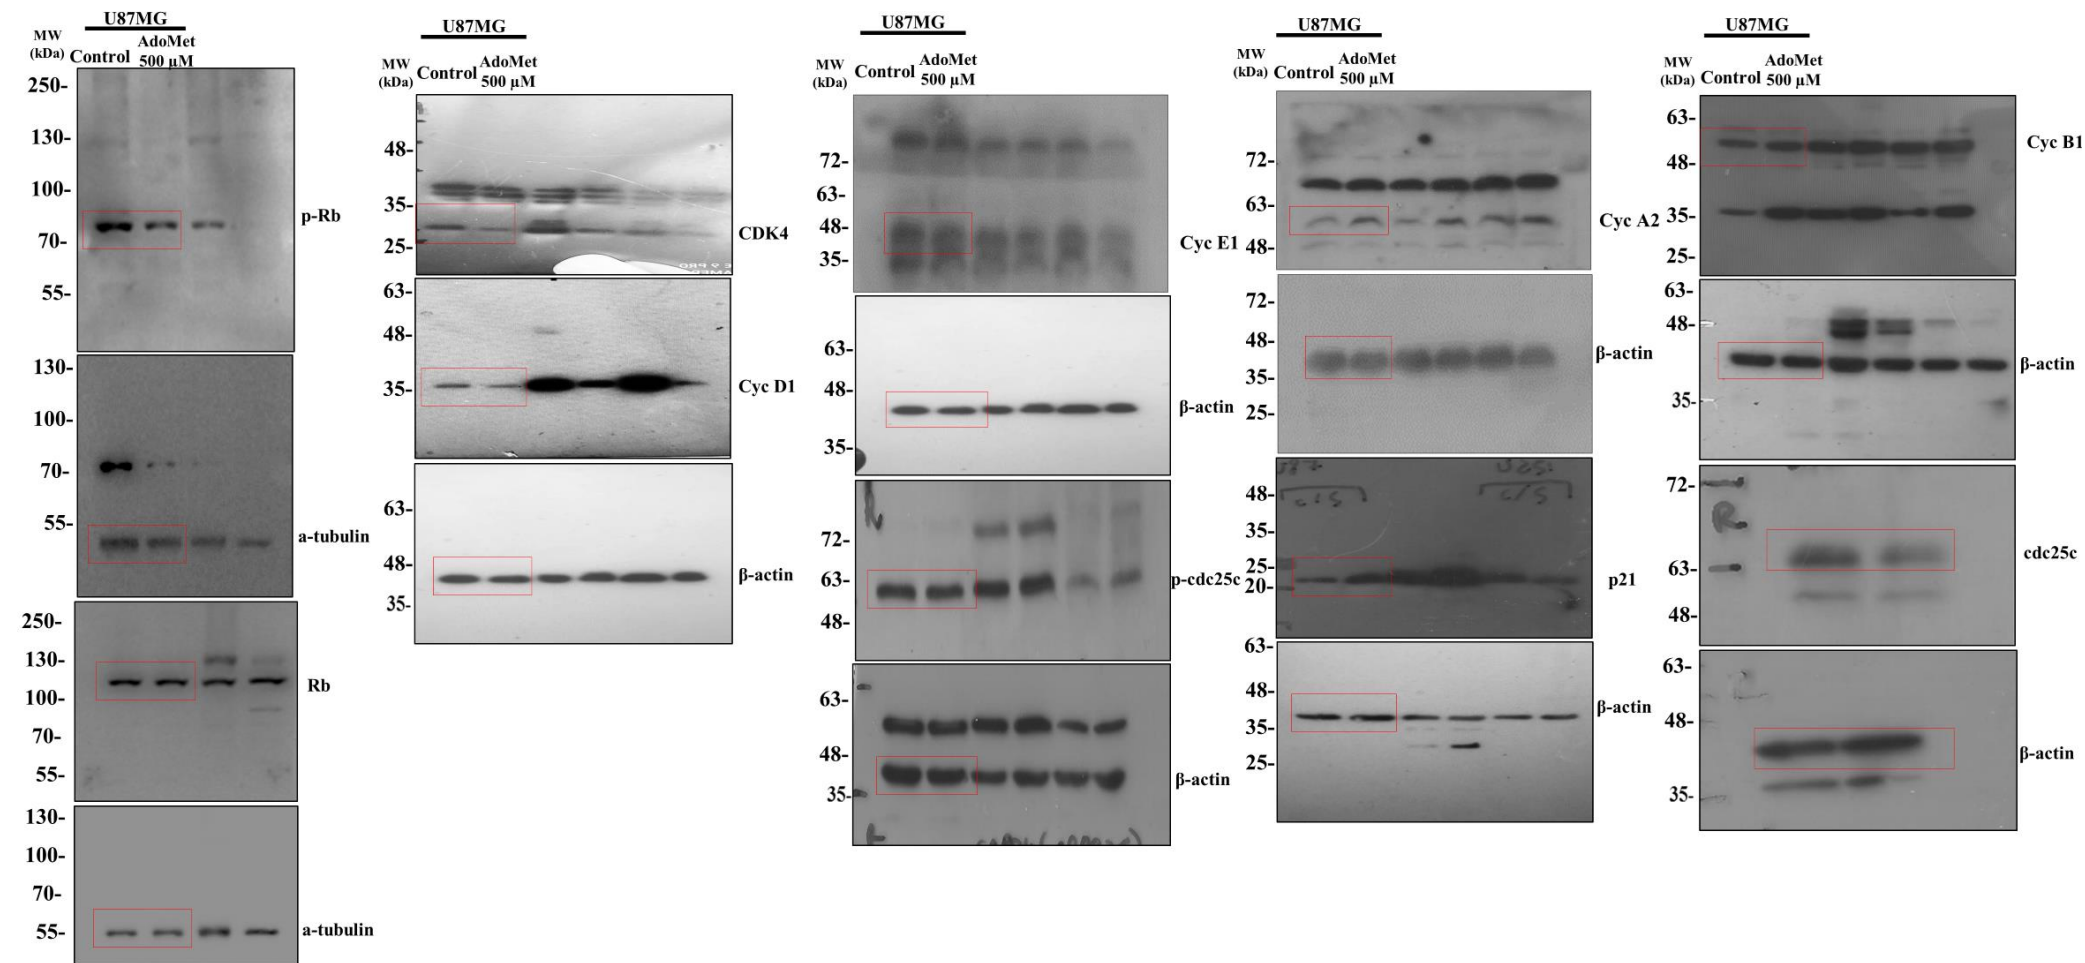

**Figure S2:** Effect of AdoMet on cell cycle in U87MG cells.

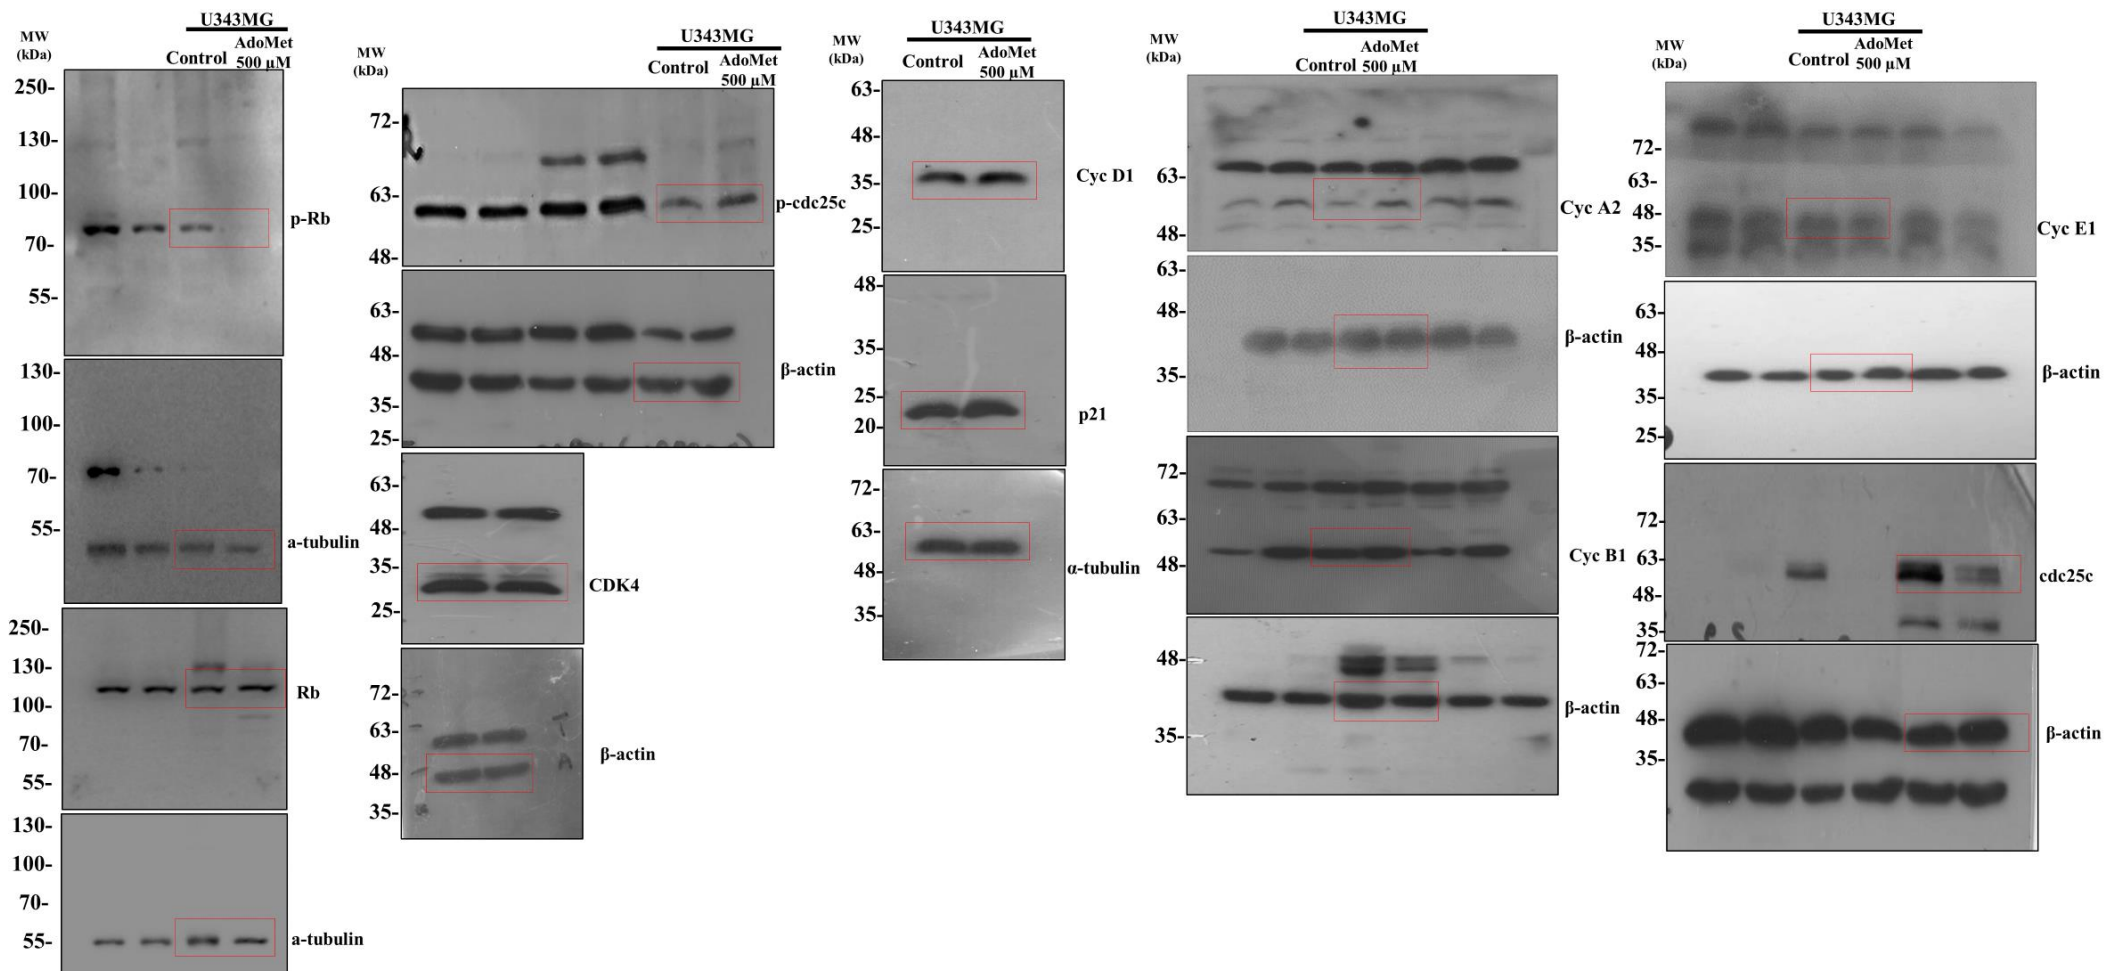

**Figure S3:** Effect of AdoMet on cell cycle in U343MG cells.

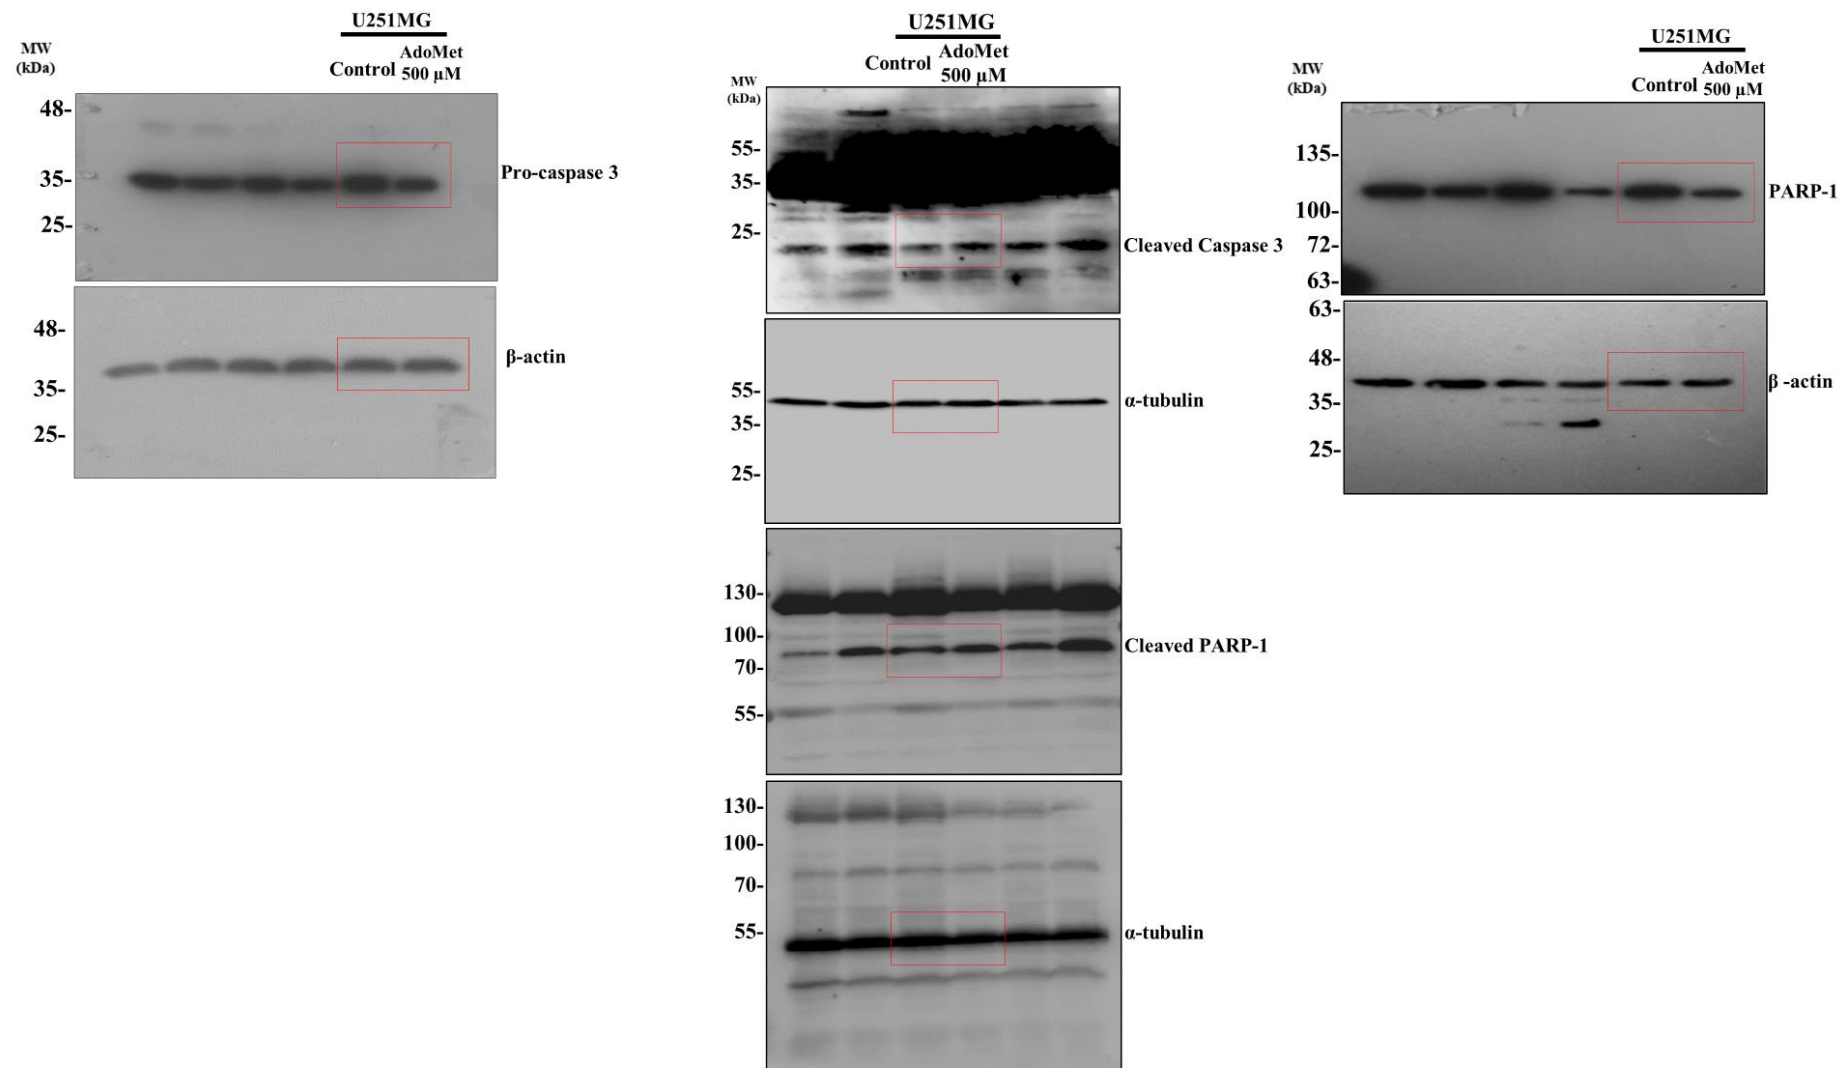

**Figure S4:** Effect of AdoMet on apoptosis in U251MG cells.

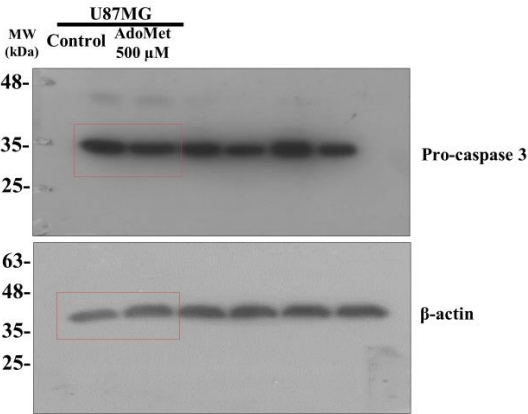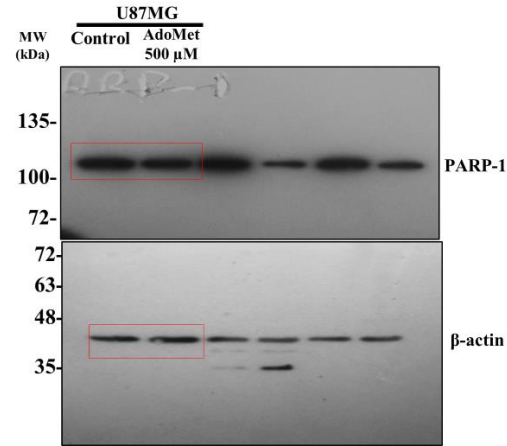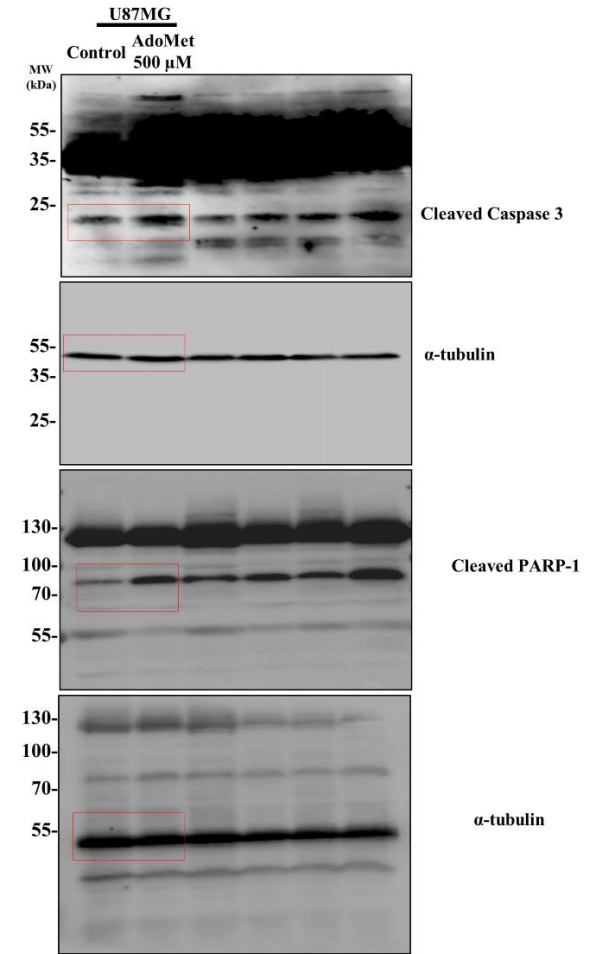

Figure S5: Effect of AdoMet on apoptosis in U87MG cells.

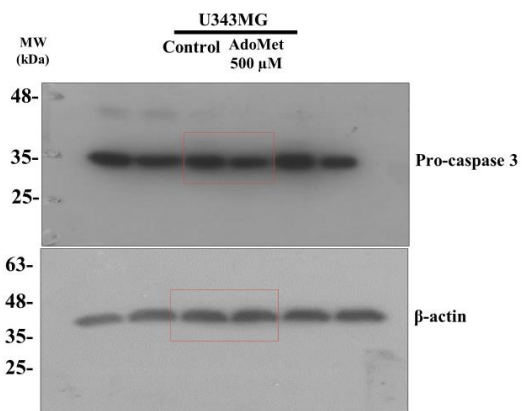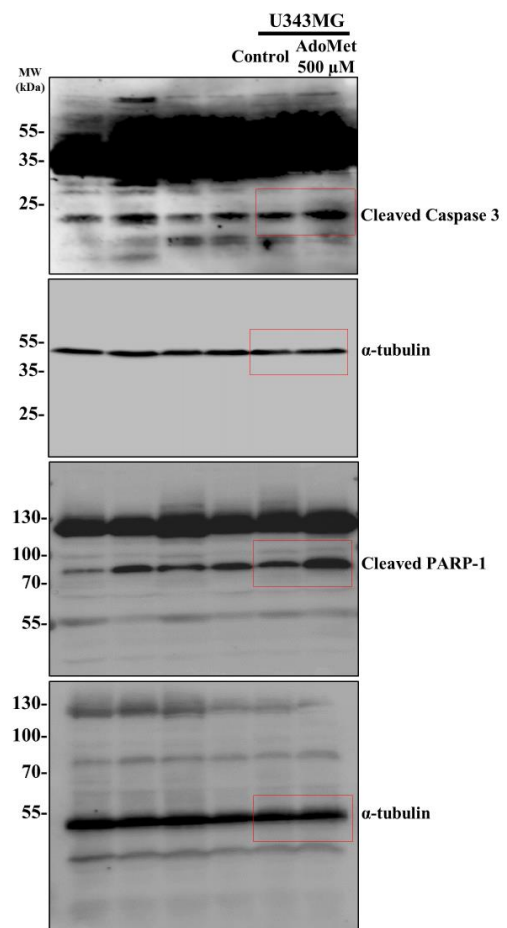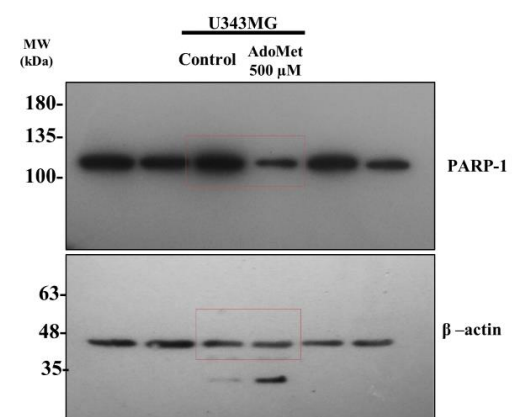

**Figure S6:** Effect of AdoMet on apoptosis in U343MG cells.



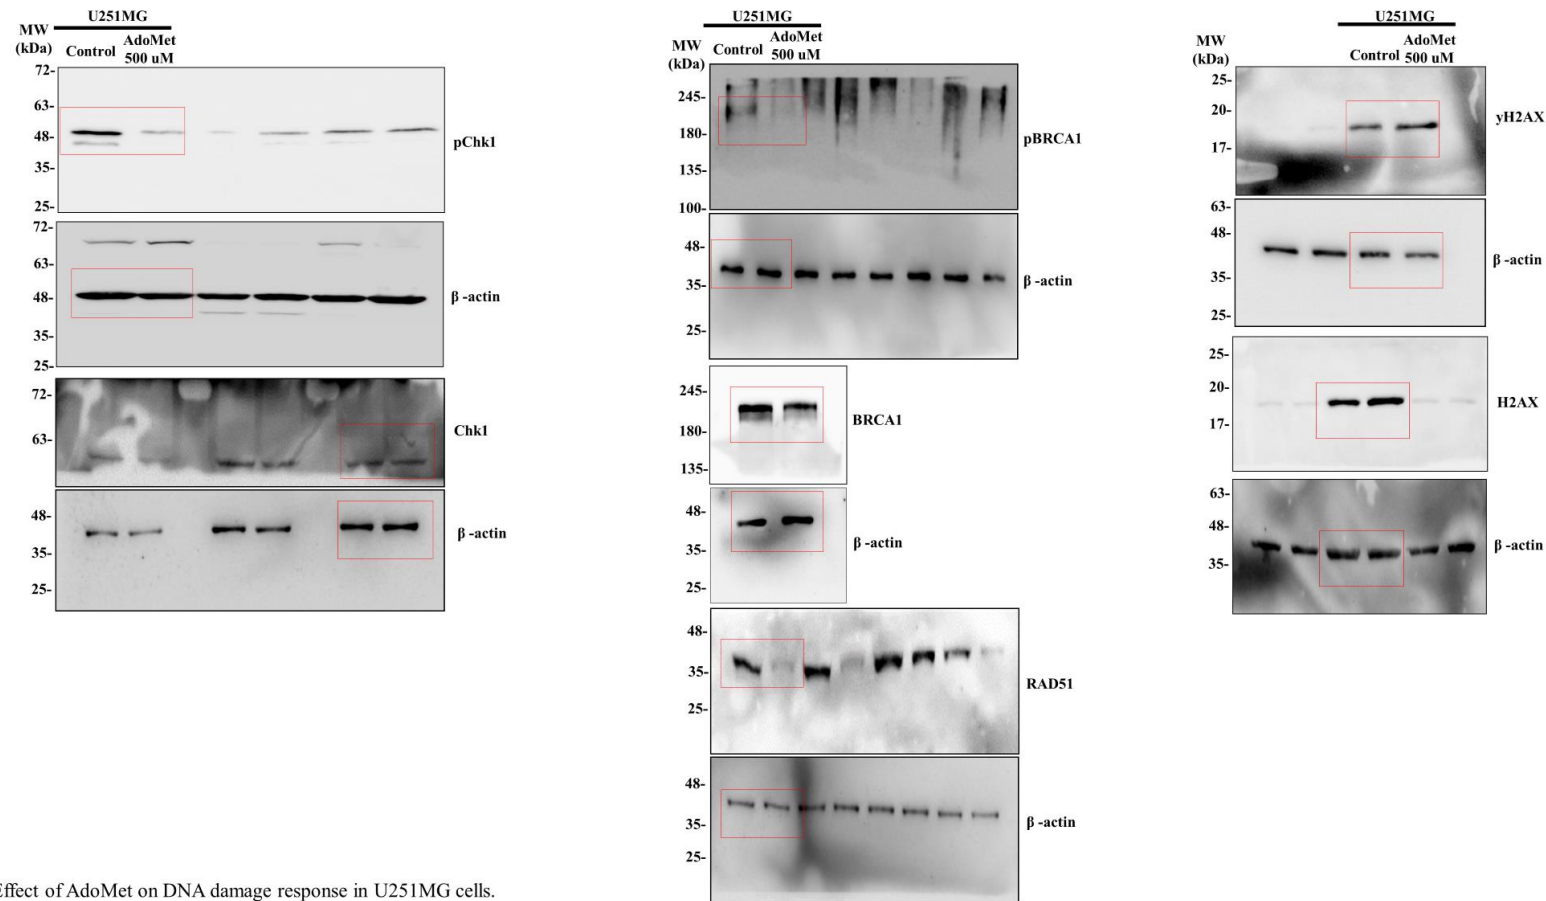

**Figure S7:** Effect of AdoMet on DNA damage response in U251MG cells.

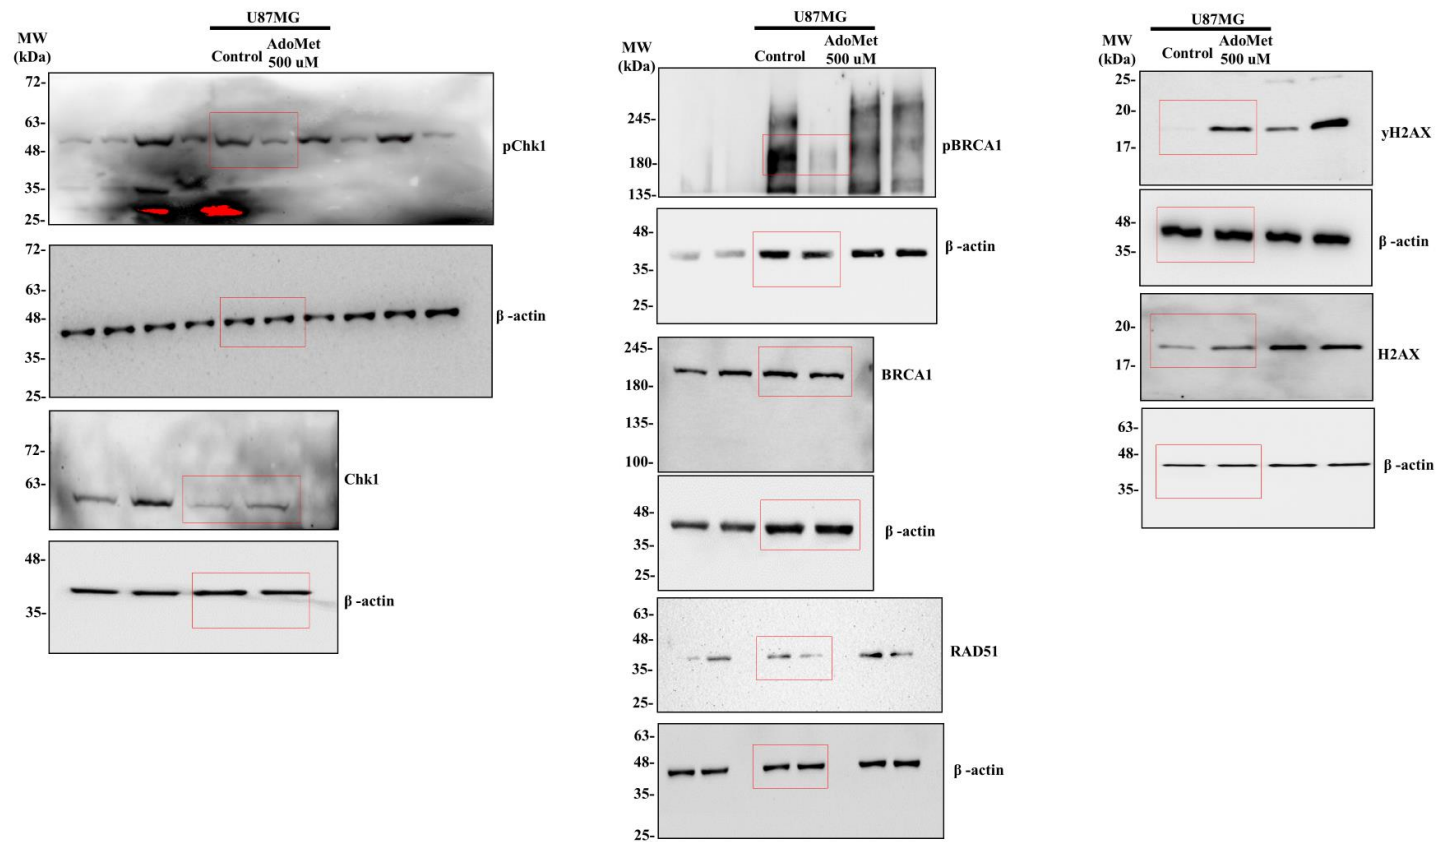

**Figure S8:** Effect of AdoMet on DNA repair in U87MG cells.



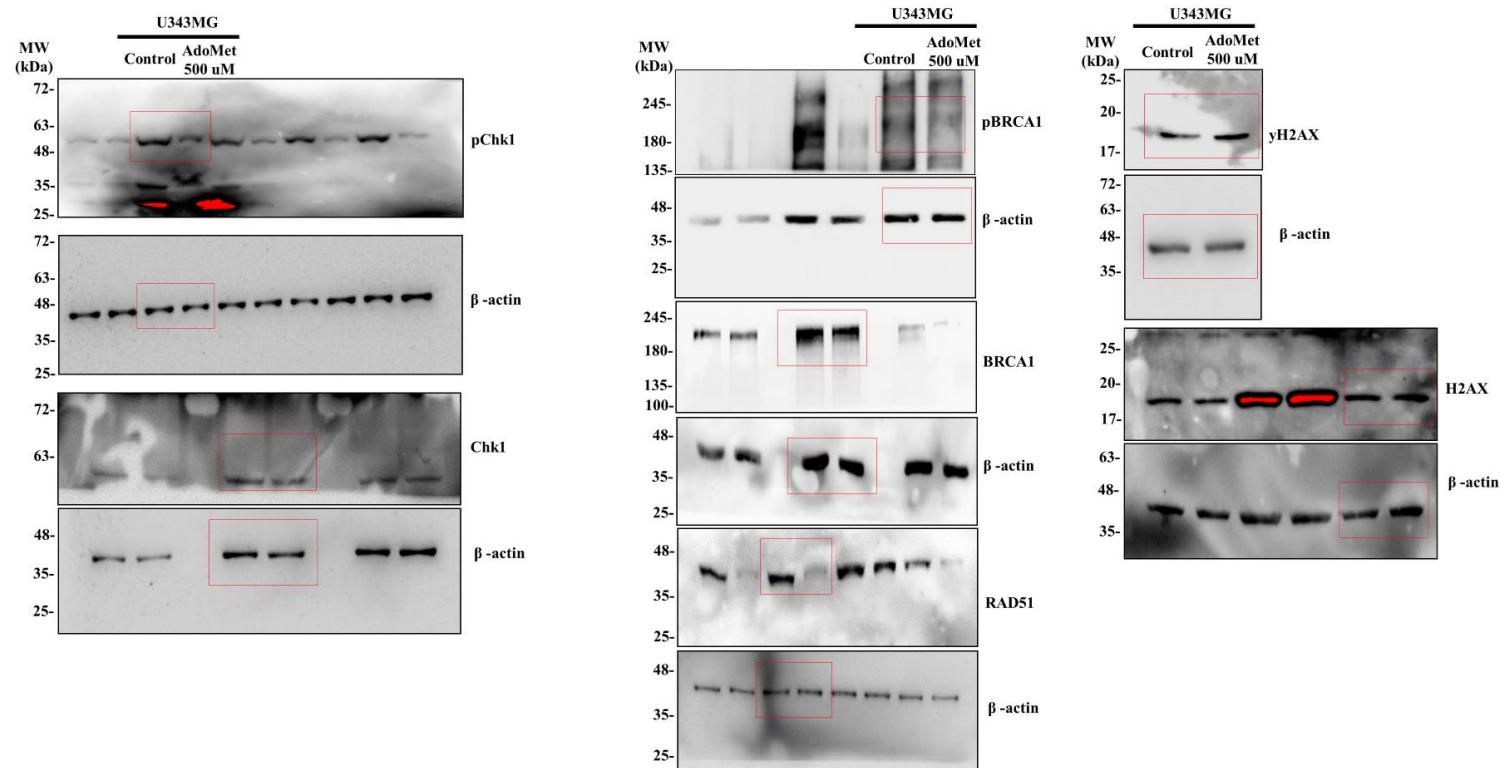

**Figure S9:** Effect of AdoMet on DNA repair in U343MG cells.

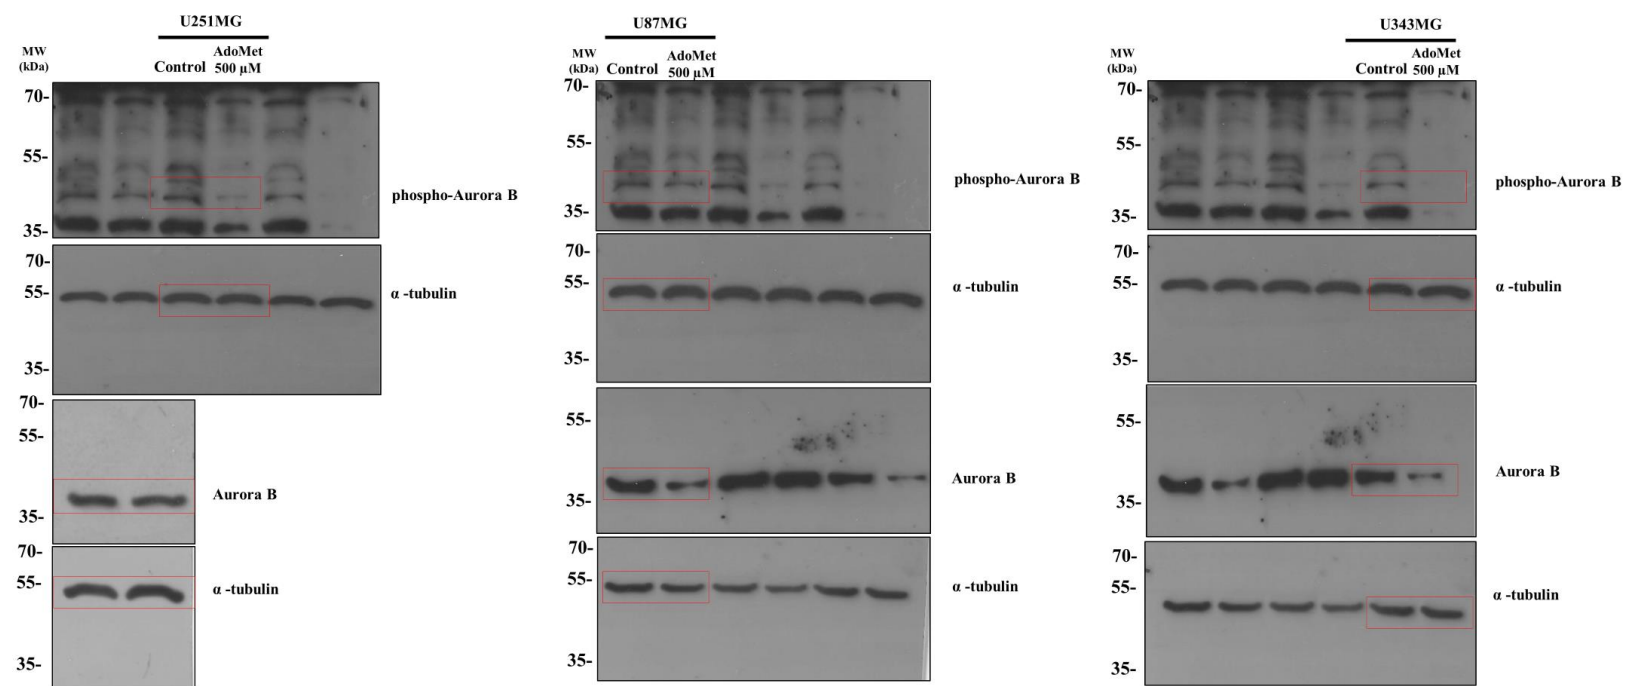

**Figure S10:** Effect of AdoMet on phospho-AuroraB and Aurora B in U251MG, U87MG, and U343MG cell lines.

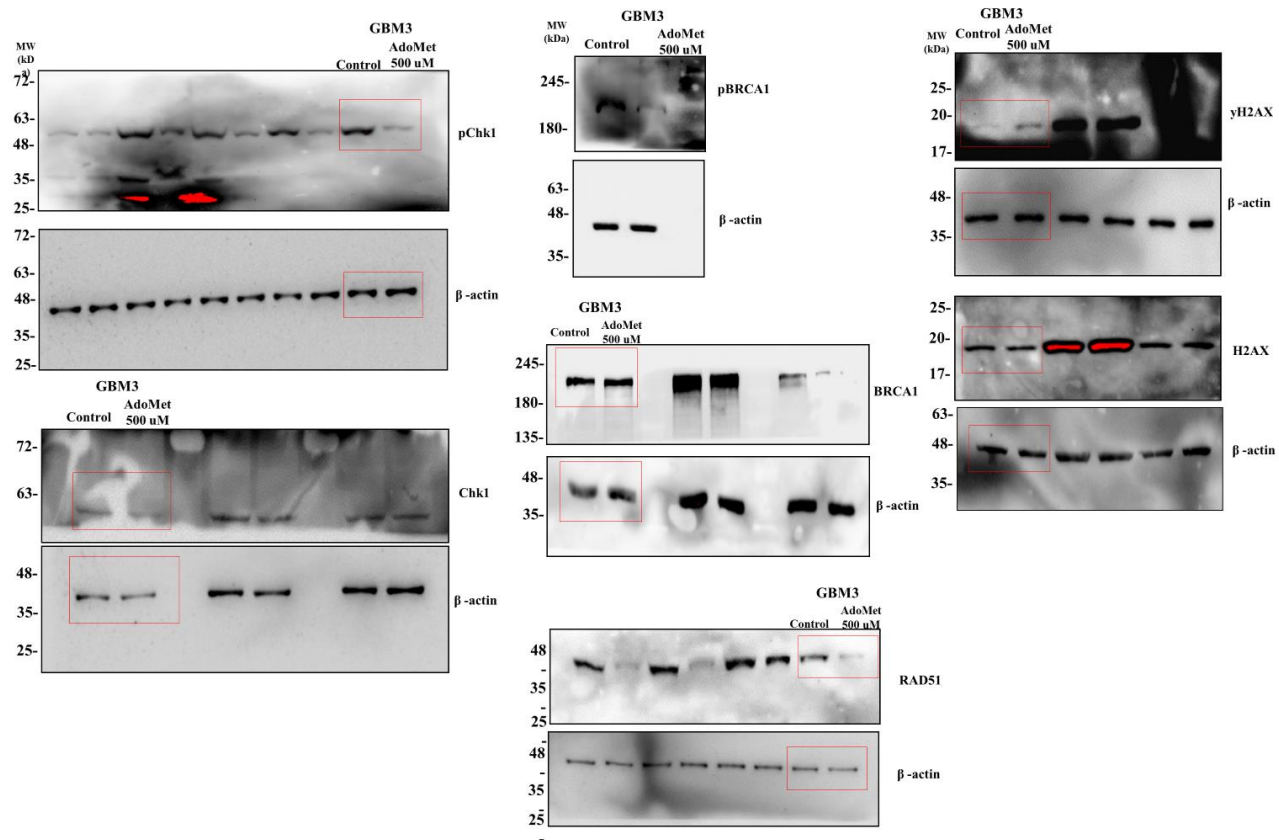

**Figure S11:** Effect of AdoMet on DNA repair in GBM3 primary cell line.

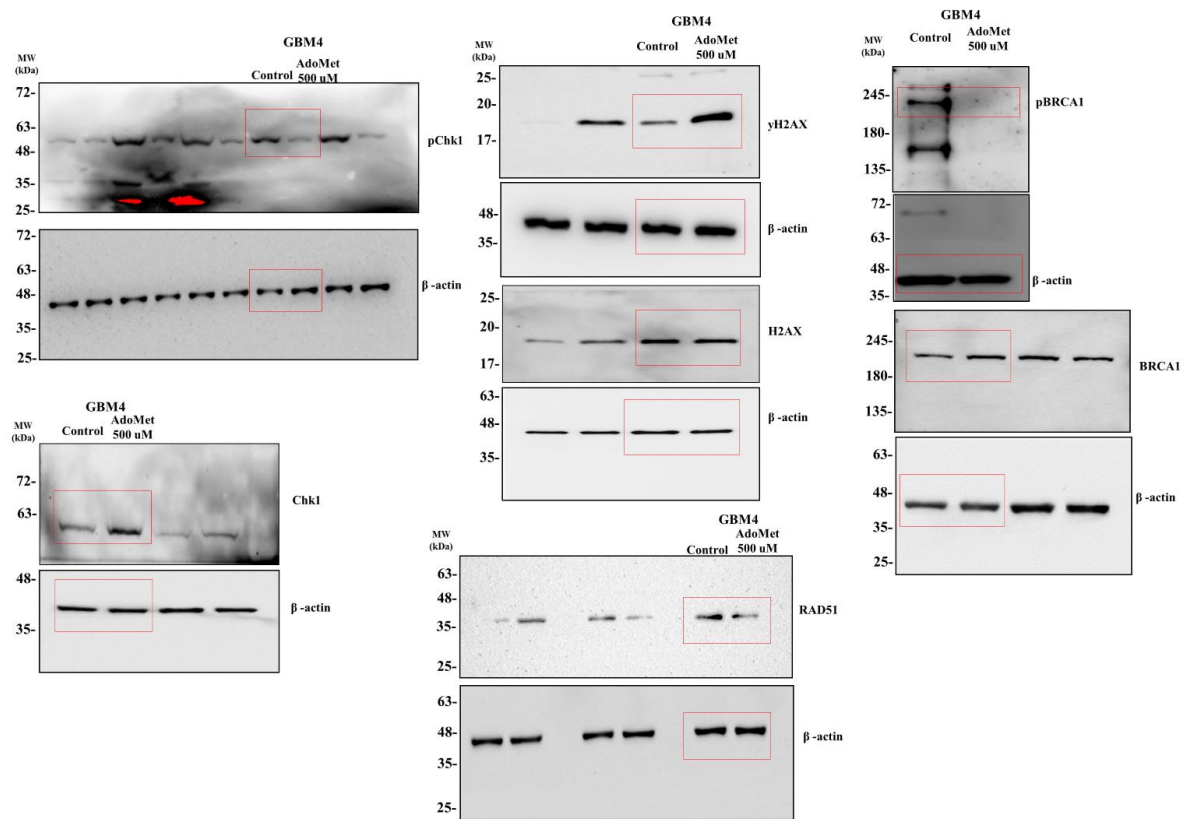

**Figure S12:** Effect of AdoMet on DNA repair in GBM4 primary cell line.
